# Supplementary material
Source: publisher figshare collection journal article supplement (https://gsajournals.figshare.com/ndownloader/files/28321947)
Supplement: Supplementary file 1 [file 28321947]

## Sheet: Table S16
Table S16 protein network of the leaves							Table S16 protein network of the leaves
#Node1	Node_degree	Gene_id	Gene_name	Regulation	Protein	Node2	Node_degree	Gene_id	Gene_name	Regulation	Protein	Combined_score	Neighborhood	Fusion	Cooccurence	Coexpression	Experimental	Database	Textmining
Glyma.06G202200	4	Glyma.06G202200	Glyma.06G202200	down	1148.SYNGTS_1882	Glyma.14G046600	3	Glyma.14G046600	Glyma.14G046600	down	1148.SYNGTS_2802	302	0	0	0	0	0	0	302
Glyma.07G089500	2	Glyma.07G089500	Glyma.07G089500	down	1148.SYNGTS_1855	Glyma.14G046600	3	Glyma.14G046600	Glyma.14G046600	down	1148.SYNGTS_2802	160	0	0	160	0	0	0	0
Glyma.07G089500	2	Glyma.07G089500	Glyma.07G089500	down	1148.SYNGTS_1855	Glyma.06G202200	4	Glyma.06G202200	Glyma.06G202200	down	1148.SYNGTS_1882	922	406	0	0	118	846	0	156
Glyma.06G202200	4	Glyma.06G202200	Glyma.06G202200	down	1148.SYNGTS_1882	Glyma.13G030400	3	Glyma.13G030400	Glyma.13G030400	up	1148.SYNGTS_2602	226	0	0	0	56	82	0	179
Glyma.17G027300	2	Glyma.17G027300	Glyma.17G027300	up	1148.SYNGTS_1536	Glyma.06G202200	4	Glyma.06G202200	Glyma.06G202200	down	1148.SYNGTS_1882	176	49	0	0	128	85	0	43
Glyma.15G243100	1	Glyma.15G243100	Glyma.15G243100	up	1148.SYNGTS_0001	Glyma.17G027300	2	Glyma.17G027300	Glyma.17G027300	up	1148.SYNGTS_1536	157	0	0	0	67	0	0	134
Glyma.07G212800	2	Glyma.07G212800	Glyma.07G212800	up	1148.SYNGTS_2485	Glyma.13G030400	3	Glyma.13G030400	Glyma.13G030400	up	1148.SYNGTS_2602	207	44	0	0	0	0	0	204
Glyma.14G156400	1	Glyma.14G156400	Glyma.14G156400	up	1148.SYNGTS_0589	Glyma.13G030400	3	Glyma.13G030400	Glyma.13G030400	up	1148.SYNGTS_2602	975	63	0	0	56	240	963	157
Glyma.10G017000	1	Glyma.10G017000	Glyma.10G017000	down	1148.SYNGTS_2484	Glyma.07G212800	2	Glyma.07G212800	Glyma.07G212800	up	1148.SYNGTS_2485	439	431	0	0	54	0	0	0
Glyma.12G036900	1	Glyma.12G036900	Glyma.12G036900	down	1148.SYNGTS_0933	Glyma.14G046600	3	Glyma.14G046600	Glyma.14G046600	down	1148.SYNGTS_2802	250	0	0	184	119	0	0	0
